# Supplementary material
Source: PubMed Central journal article supplement (PMC4378148)
Supplement: supp_pp.114.252239_252239SUPPLEMENTARY_TABLES_AND_FIGURES.pdf [file supp_pp.114.252239_252239SUPPLEMENTARY_TABLES_AND_FIGURES.pdf]

## SUPPLEMENTARY TABLES AND FIGURES

1 Table S1.

2 Correlation between the relative decrease of Fv/Fm on the first day after increasing the growth  
3 irradiance from 100  $\mu\text{mol m}^{-2} \text{s}^{-1}$  to 600  $\mu\text{mol m}^{-2} \text{s}^{-1}$  (high light, HL) and other photosynthetic  
4 parameters during the acclimation period to increased growth irradiance

5

6 Table S2.

7 Annotations of the gene function as indicated in TAIR ([www.arabidopsis.org](http://www.arabidopsis.org)) of all the genes found to  
8 be in linkage disequilibrium ( $r > 0.45$ ) with the SNPS associated with a  $-\log_{10}(p) > 4$  for  $\Phi_{\text{PSII}}$   
9 measured one hour after a step-wise increase in irradiance from 100 to 550  $\mu\text{mol m}^{-2} \text{s}^{-1}$ .

10

11 Figure S1.

12 Light response curves per accession in different constant growth irradiances

13

14 Figure S2.

15 Maximum relative electron transport rates (rETR) measured at saturating actinic irradiance per  
16 accession in different constant growth irradiances

17

18 Figure S3.

19 Variation in parameterized value of the relation of maximum rETR with growth irradiance

20

21 Figure S4.

22 Complete variation in light response curves of rETR of all 12 accessions grown in low growth  
23 irradiance level (LL), response to high growth irradiance level (HL), or grown in HL

24

25 Figure S5.

26 Phenotypic distribution of  $\Phi_{\text{PSII}}$  one day before (A) and one hour after (B) an increase in growth  
27 irradiance from 100  $\mu\text{mol m}^{-2} \text{s}^{-1}$  to 550  $\mu\text{mol m}^{-2} \text{s}^{-1}$  for the 344 accessions used for the GWAS.

28

29 Table S1. Correlation between the relative decrease of  $F_v/F_m$  on the first day after increasing the  
 30 growth irradiance from  $100 \mu\text{mol m}^{-2} \text{s}^{-1}$  to  $600 \mu\text{mol m}^{-2} \text{s}^{-1}$  and other photosynthetic parameters  
 31 during the acclimation period to increased growth irradiance. Dark grey cells indicated with \*\*  
 32 represent significant correlations at  $P=0.05$ ; light grey cells indicated with \* represent significant  
 33 correlations at  $P=0.10$ .

| DAY0                                             |                     | $F_v/F_m$ | $F_v'/F_m'(600)$ | NPQ(600) | $q_P(600)$ | $\Phi_{PSII}(600)$ |
|--------------------------------------------------|---------------------|-----------|------------------|----------|------------|--------------------|
| Decrease in $F_v/F_m$ on day 1 relative to day 0 | Pearson Correlation | 0.088     | 0.031            | 0.025    | .395**     | 0.296*             |
|                                                  | Sig. (2-tailed)     | 0.616     | 0.862            | 0.886    | 0.019      | 0.085              |
| DAY1<br>(after HL increase)                      |                     | $F_v/F_m$ | $F_v'/F_m'(600)$ | NPQ(600) | $q_P(600)$ | $\Phi_{PSII}(600)$ |
| Decrease in $F_v/F_m$ on day 1 relative to day 0 | Pearson Correlation | .792**    | .077             | .364**   | .525**     | .393**             |
|                                                  | Sig. (2-tailed)     | .000      | .659             | .032     | .001       | .019               |
| DAY2<br>(after HL increase)                      |                     | $F_v/F_m$ | $F_v'/F_m'(600)$ | NPQ(600) | $q_P(600)$ | $\Phi_{PSII}(600)$ |
| Decrease in $F_v/F_m$ on day 1 relative to day 0 | Pearson Correlation | .636**    | .109             | .255     | .394**     | 0.286*             |
|                                                  | Sig. (2-tailed)     | .000      | .533             | .139     | .019       | .096               |
| DAY3<br>(after HL increase)                      |                     | $F_v/F_m$ | $F_v'/F_m'(600)$ | NPQ(600) | $q_P(600)$ | $\Phi_{PSII}(600)$ |
| Decrease in $F_v/F_m$ on day 1 relative to day 0 | Pearson Correlation | .617**    | 0.311*           | -.040    | .387**     | .396**             |
|                                                  | Sig. (2-tailed)     | .000      | .069             | .819     | .022       | .018               |
| DAY4<br>(after HL increase)                      |                     | $F_v/F_m$ | $F_v'/F_m'(600)$ | NPQ(600) | $q_P(600)$ | $\Phi_{PSII}(600)$ |
| Decrease in $F_v/F_m$ on day 1 relative to day 0 | Pearson Correlation | .505**    | 0.306*           | -.084    | .382**     | .365**             |
|                                                  | Sig. (2-tailed)     | .002      | .074             | .631     | .024       | .031               |

35 Table S2. Annotations of the gene function as indicated in TAIR ([www.arabidopsis.org](http://www.arabidopsis.org)) of all the  
 36 genes found to be in linkage disequilibrium ( $r > 0.45$ ) with the SNPS associated with a  $-\log_{10}(p) > 4$   
 37 for  $\Phi_{PSII}$  measured one hour after a step-wise increase in irradiance from 100 to 550  $\mu\text{mol m}^{-2} \text{s}^{-1}$ .

| Gene      | Description                                                                                                                    |
|-----------|--------------------------------------------------------------------------------------------------------------------------------|
| AT1G21060 | Unknown protein                                                                                                                |
| AT1G21065 | Unknown protein                                                                                                                |
| AT1G21070 | Nucleotide-sugar transporter family protein                                                                                    |
| AT1G21100 | IGMT1, indole glucosinolate O-methyltransferase 1                                                                              |
| AT1G21110 | IGMT3, indole glucosinolate O-methyltransferase 3                                                                              |
| AT1G21120 | IGMT2, indole glucosinolate O-methyltransferase 2                                                                              |
| AT1G21130 | IGMT4, indole glucosinolate O-methyltransferase 4                                                                              |
| AT1G21140 | Nodulin-like1, transcript abundance repressed under conditions of Fe-deficient growth                                          |
| AT1G74190 | Receptor-like protein 15, located in endomembrane system                                                                       |
| AT2G26290 | Root-specific kinase1                                                                                                          |
| AT3G04880 | Encodes a novel protein involved in DNA repair from UV damage                                                                  |
| AT3G04890 | Unknown protein                                                                                                                |
| AT3G04900 | Heavy metal transport/ detoxification superfamily protein                                                                      |
| AT3G04903 | Encodes a defensin-like family protein                                                                                         |
| AT3G05790 | Lon-protease 4, for degradation of abnormal, damaged, and unstable protein                                                     |
| AT3G05800 | AIF1 (activation-tagged BRI1 suppressor 1)-interacting factor 1, involved in MAPK cascade, major regulator                     |
| AT3G05810 | Chromatin assembly/disassembly protein                                                                                         |
| AT3G05820 | Encodes a putative plastid-targeted alkaline/neutral invertase                                                                 |
| AT3G05830 | Encodes an intermediate filament-like protein, function unknown                                                                |
| AT3G05835 | tRNA-Ile                                                                                                                       |
| AT3G05840 | Encodes a kinase involved in meristem organization                                                                             |
| AT3G05850 | Encodes a member of a domesticated transposable element gene family                                                            |
| AT3G05858 | Unknown protein                                                                                                                |
| AT3G05870 | Subunit of the anaphase promoting complex in cell division                                                                     |
| AT3G05880 | Encodes a small, highly hydrophobic protein induced by low temperatures, dehydration and salt stress (A)                       |
| AT3G05890 | Encodes a small, highly hydrophobic protein induced by low temperatures, dehydration and salt stress (B)                       |
| AT3G54000 | Unknown protein                                                                                                                |
| AT4G21750 | MERISTEM LAYER 1, a homeobox protein similar to GL2; expressed in both the apical and basal daughter cells of the zygote.      |
| AT4G21770 | Pseudouridine synthase, involved in RNA modification                                                                           |
| AT5G03750 | Unknown protein                                                                                                                |
| AT5G64910 | Unknown protein                                                                                                                |
| AT5G64920 | Encodes a RING-H2 protein, involved in ubiquitination                                                                          |
| AT5G64930 | Regulator of expression of pathogenesis-related genes. Participates in signal transduction pathways involved in plant defence. |
| AT5G64940 | Oxidative stress-related ABC1-like protein (ATP-binding cassette)                                                              |
| AT5G64950 | Mitochondrial transcription termination factor family protein                                                                  |
| AT5G64970 | Mitochondrial substrate carrier family protein                                                                                 |
| AT5G64990 | RAB GTPase homolog, GTPase activity, located in mitochondrion                                                                  |
| AT5G65020 | Annexin 2, calcium binding protein                                                                                             |

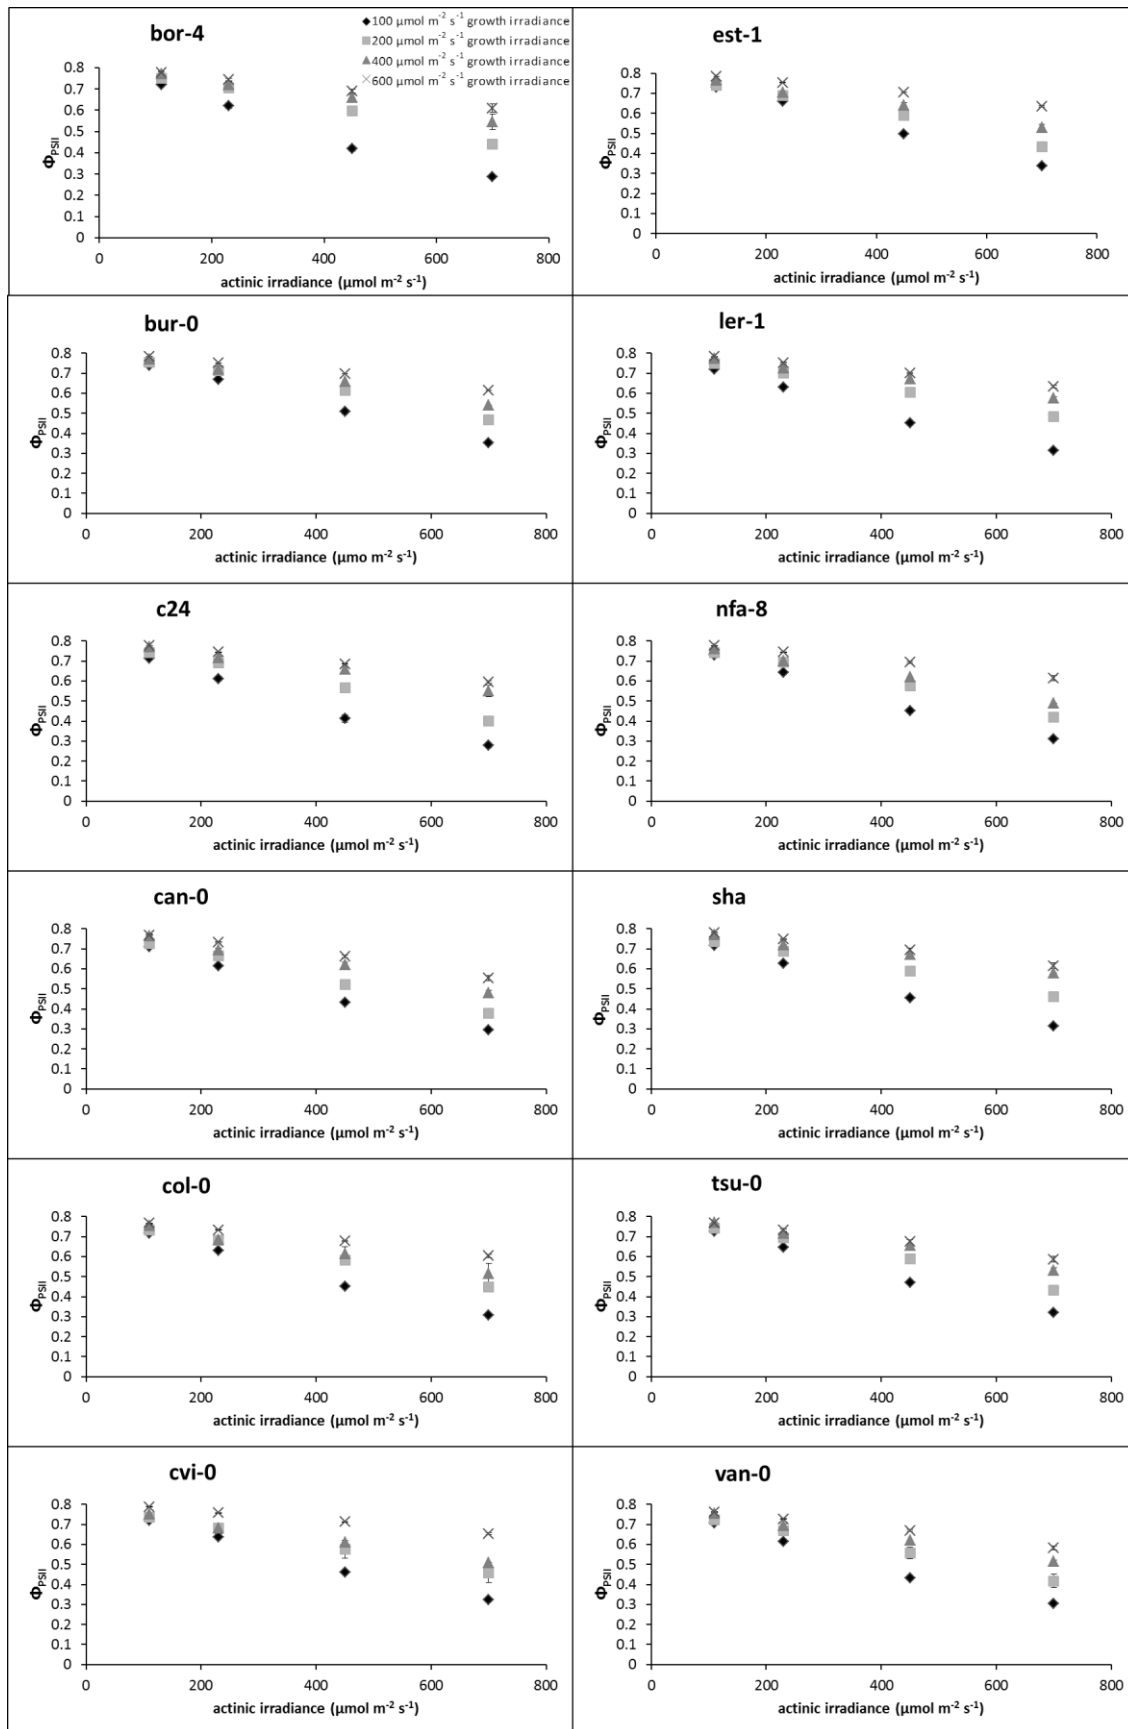

39

40 Figure S1. Light response curves per accession in different constant growth irradiances. Error bars  
 41 indicate the standard error of the mean, N=3.

42

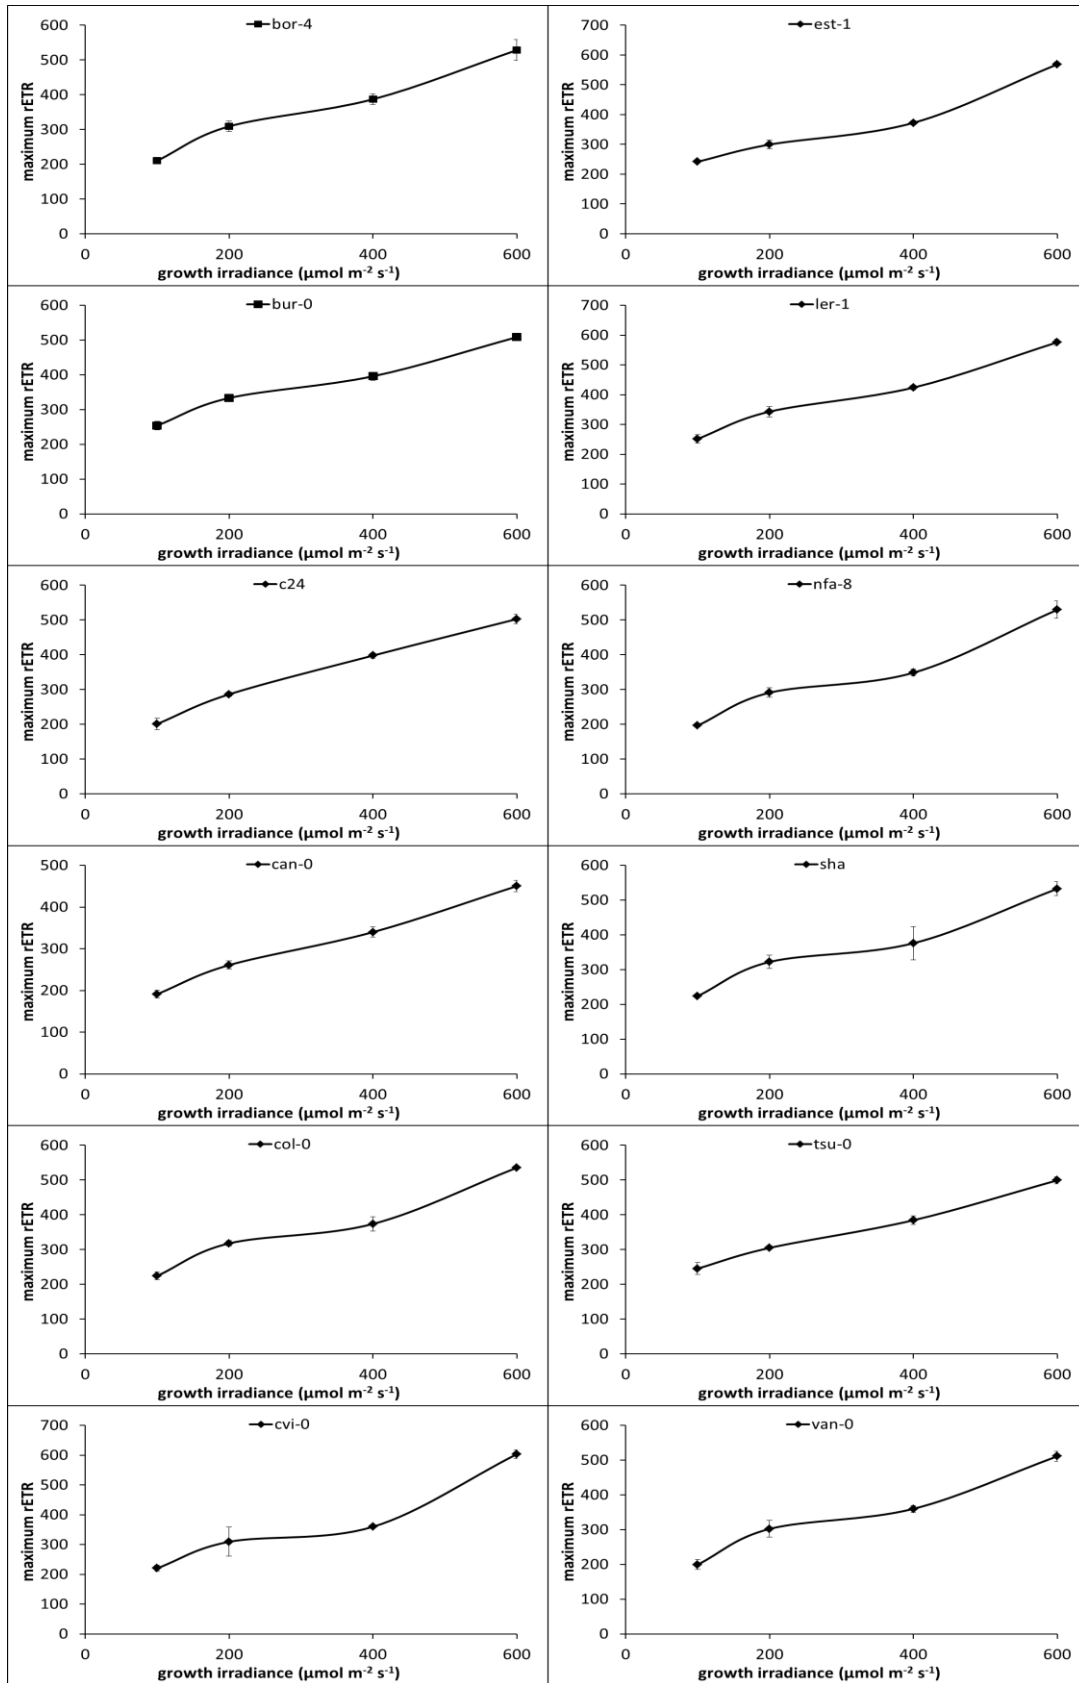

43

44 Figure S2. Maximum relative electron transport rates (rETR) measured at saturating actinic irradiance  
 45 per accession in different constant growth irradiances. Error bars indicate the standard error of the  
 46 mean, N=3.

| A Descriptives |   |                          |                |            | Tukey's HSD test        |        |        |
|----------------|---|--------------------------|----------------|------------|-------------------------|--------|--------|
|                | N | Mean parameterized value | Std. Deviation | Std. Error | Subset for alpha = 0.05 |        |        |
|                |   |                          |                |            | 1                       | 2      | 3      |
| tsu-0          | 3 | 1.1117                   | .58950         | .34035     | 1.1117                  |        |        |
| c24            | 3 | 1.3907                   | .56734         | .32755     | 1.3907                  | 1.3907 |        |
| est-1          | 3 | 1.4367                   | .37650         | .21737     | 1.4367                  | 1.4367 |        |
| cvi-0          | 3 | 1.5407                   | .36650         | .21160     | 1.5407                  | 1.5407 | 1.5407 |
| can-0          | 3 | 1.6290                   | .27900         | .16108     | 1.6290                  | 1.6290 | 1.6290 |
| sha            | 3 | 2.1377                   | .12150         | .07015     | 2.1377                  | 2.1377 | 2.1377 |
| bur-0          | 3 | 2.1720                   | .19300         | .11143     | 2.1720                  | 2.1720 | 2.1720 |
| bor-4          | 3 | 2.3607                   | .98273         | .56738     | 2.3607                  | 2.3607 | 2.3607 |
| col-0          | 3 | 2.5650                   | .63877         | .36879     | 2.5650                  | 2.5650 | 2.5650 |
| ler-1          | 3 | 2.6727                   | .58750         | .33919     | 2.6727                  | 2.6727 | 2.6727 |
| nfa-8          | 3 | 2.9483                   | .75612         | .43655     |                         | 2.9483 | 2.9483 |
| van-0          | 3 | 3.1210                   | .52400         | .30253     |                         |        | 3.1210 |
| Sig.           |   |                          |                |            | .067                    | .068   | .061   |

47

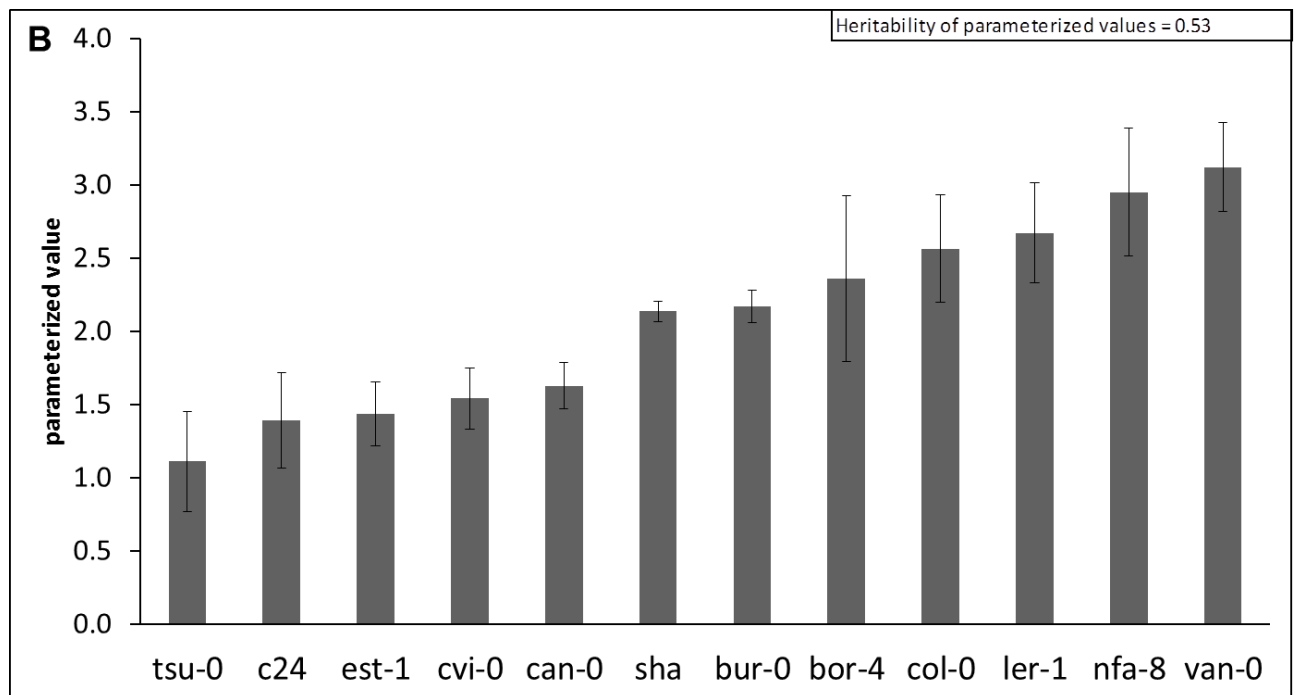

48

49 Figure S3. Variation in parameterized value of the relation of maximum rETR with growth irradiance  
50 level; (A) Descriptive ANOVA table including a Tukey's HSD test revealing three significantly  
51 different groups for the parameterized value at  $p=0.05$ ; (B) Variation in parameterized value for the  
52 relation between photosynthetic capacity and growth irradiance, Error bars indicate the standard error  
53 of the mean,  $N=3$ . The top right inset shows the heritability calculated for this trait.

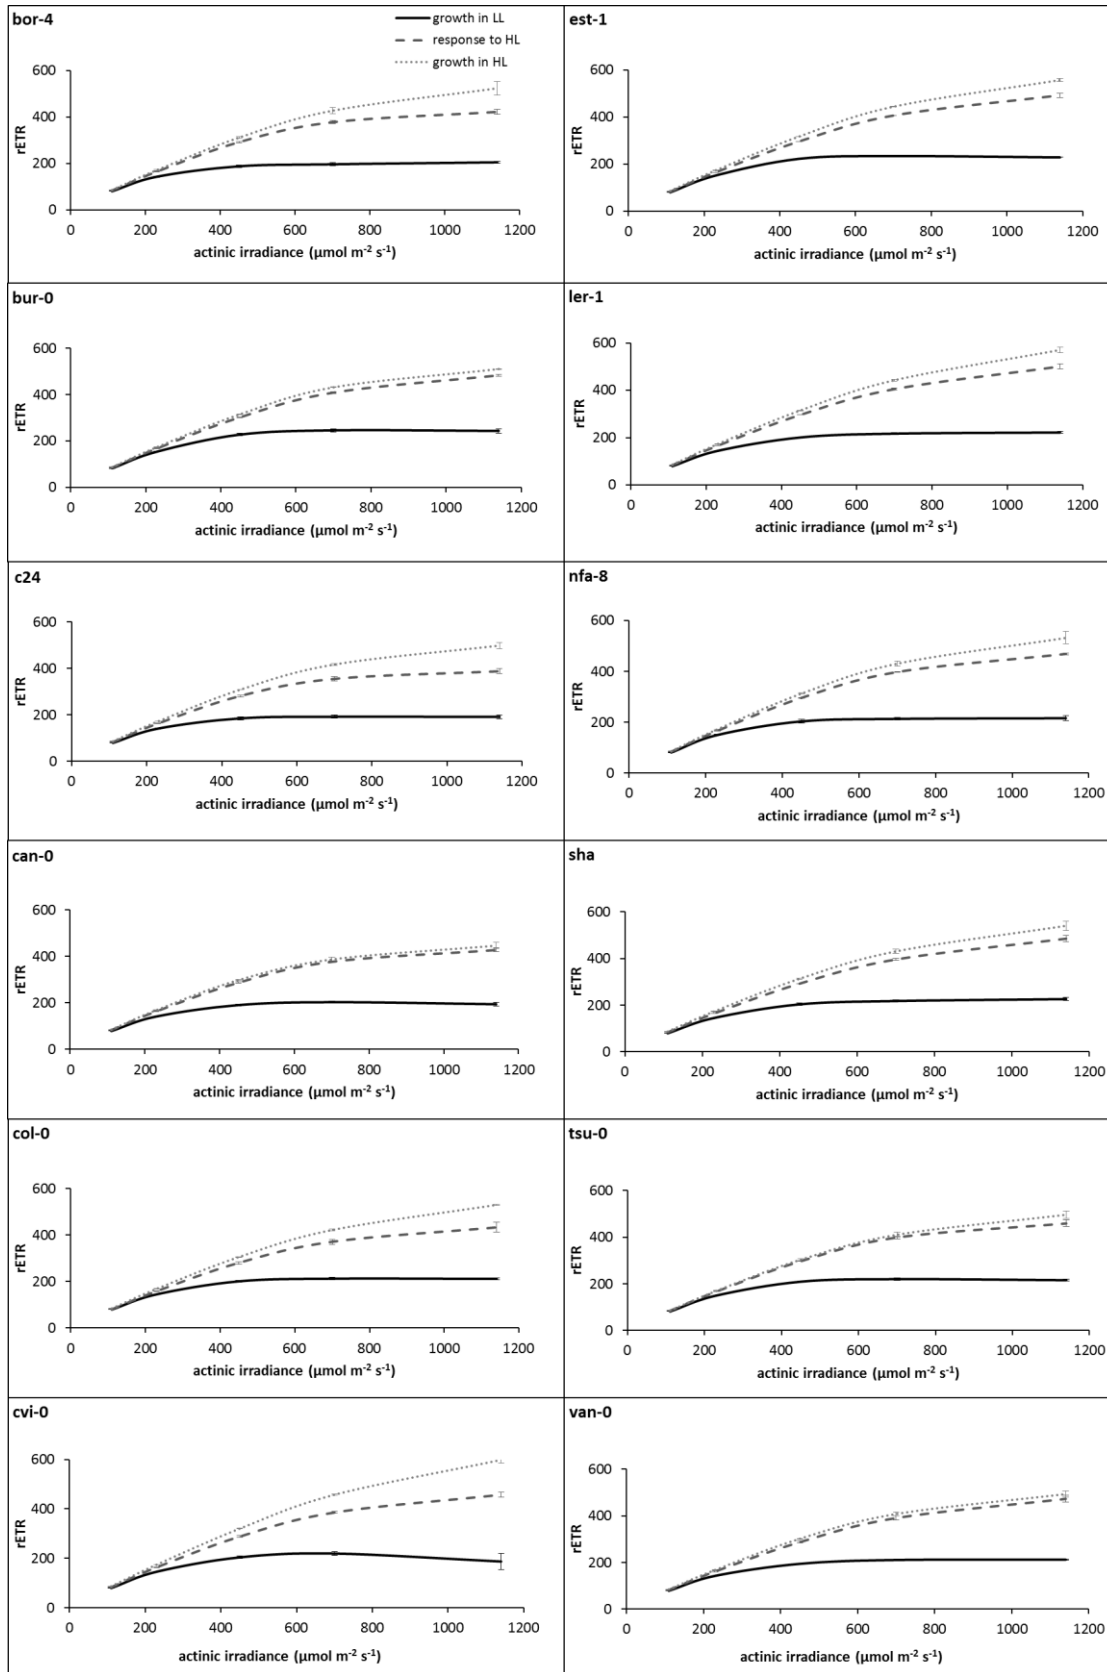

54

55 Figure S4. Complete variation in light response curves of rETR of all 12 accessions grown in low  
 56 growth irradiance level (LL), response to high growth irradiance level (HL), or grown in HL

57

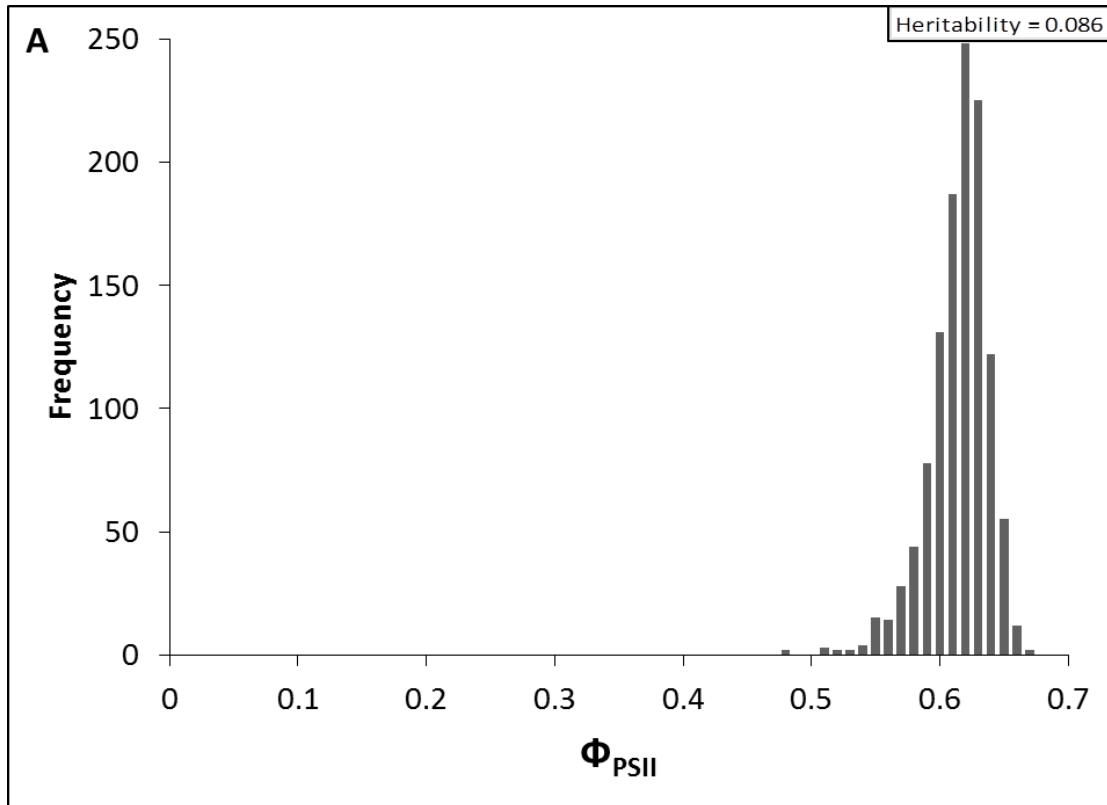

58

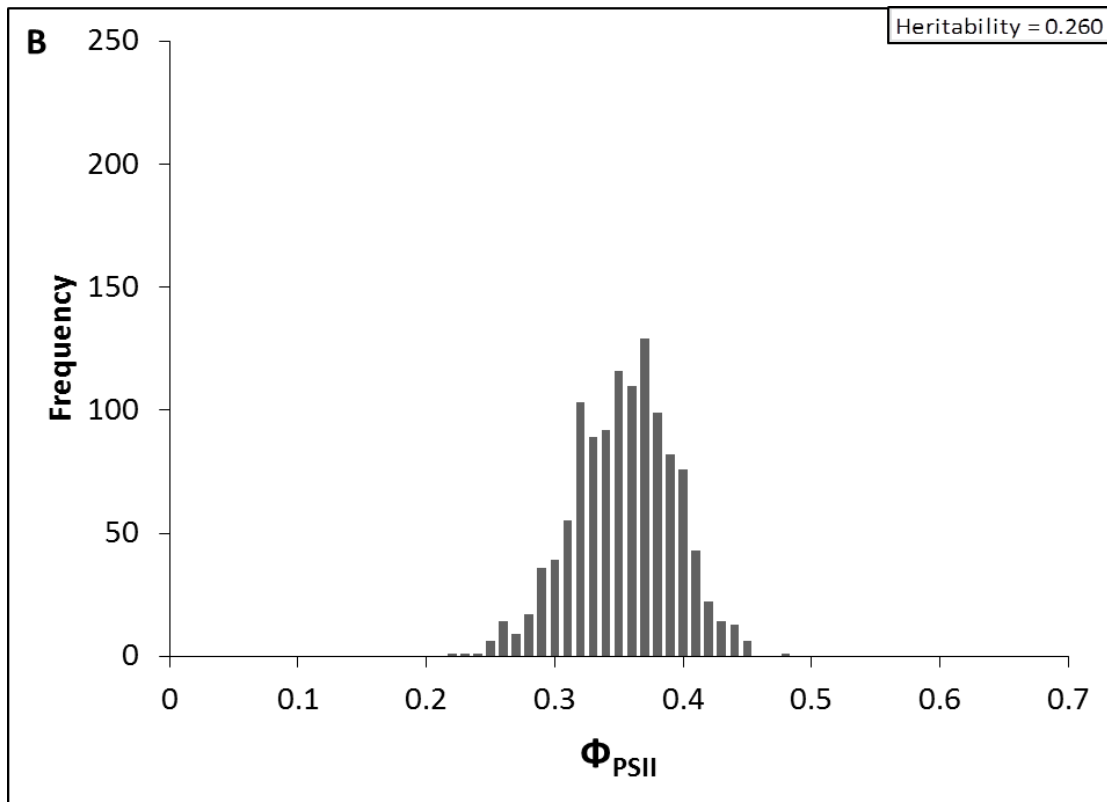

59

60 Figure S5. Phenotypic distribution of  $\Phi_{PSII}$  one day before (A) and one hour after (B) an increase in  
 61 growth irradiance from  $100 \mu\text{mol m}^{-2} \text{s}^{-1}$  to  $550 \mu\text{mol m}^{-2} \text{s}^{-1}$  for the 344 accessions used for the  
 62 GWAS.
